# Supplementary material for: Increasing participation of underrepresented groups in cancer early detection research: a scoping review
Source: Research Square preprint supplement (doi:10.21203/rs.3.rs-5005757/v1), 2025-10-02
Supplement: Supplementary file 1 [file c488c0eabd311650a3b67fb0.xlsx]

## Sheet: Table 1
Article title	Date	Authors	Country	Location of research	Underserved group identified	Type of research	Type of cancer	Barrier to participation identified	Intervention	Baseline measures reported (yes/no)	Outcome measures reported (yes/no)	Study type	Sample size N=participants	Method for testing intervention	Succesful in achieving primary outcome	Perceived quality of article (excellent/good/ok/poor)	Database	Link	Notes
A pilot program in collaboration with African American churches successfully increases awareness of the importance of cancer research and participation in cancer translational research studies among African Americans	2012-06-01	Colon-Otero, G. et al	USA	Jacksonville, Florida, USA	Black	genomic; prevention;	myeloma; breast	trial awareness; knowledge; access to trials; mistrust; fear; cultural beliefs; racial discrimination	educational programme on healthy behaviour and cancer research in churches; samples taken for donator's own benefit but with option to donate for research - 93% donated; immediate study access at the time of the event	yes	yes	prospective cohort study	318	quantitative; qualitative	yes - 93% agreed to donate samples after intervention	good	Pubmed	https://www.ncbi.nlm.nih.gov/pmc/articles/PMC3736846/
Recruiting African Immigrant Women for Community‐Based Cancer Prevention Studies: Lessons Learned from the AfroPap Study	2019-05-01	Cudjoe, J. et al	USA	Washington DC, Maryland, Virginia, USA	Black women, African immigrants	screening research	cervical	mistrust; financial burden; fear of privacy breach;	recruitment in churches; recruitment through word of mouth; increasing cultural competence of research team; gender concordance; promoting altruism through health education; online recruitment via Whatsapp	no	yes		167	quantitative	yes - recruitment target met	excellent - great breakdown of all different recruitment methods. successful recruitment of AI women was the result of the synergism of various recruitment strategies used	MANUAL	https://pubmed.ncbi.nlm.nih.gov/31102117/
A pilot study of a culturally-appropriate, educational intervention to increase participation in cancer clinical trials among African Americans and Latinos	2021-09-01	Cunningham-Erves, J. et al	USA	Tennessee, USA	Black; Hispanic	attitudes to and knowledge of cancer research; CBPR?	multiple cancers	mistrust; knowledge; trial awareness	educational intervention with video testimonials with minority community members and researchers at 13 town halls (7 Black and 6 Latino); recruitment for town halls flyers, newsletters and word-of-mouth; education about cancer prevention, research, why research is important for prevention and control of cancer; information about risks, benefits, successes and patient protection in research; train…	yes	yes	mixed methods	198	quantitative	yes - willingness to participate in cancer research, knowledge of cancer, and trust in medical researchers increased significantly for Black participants. For Latinos willingness to participate and trust in med researchers did not significantly increased , but knowledge did.	good	Pubmed	https://doi.org/10.1007/s10552-021-01449-7	Participants were recruited via word-of-mouth and flyers, so likely that participants already had interest in topics to be discussed and may not be representative of gen pop
Empowering Promotores de Salud as partners in cancer education and research in rural southwest Kansas	2015-01-01	Cupertino, A.P. et al	USA	rural southwest Kansas, USA	Hispanic; rural; recently immigrated	CBPR; attitudes to and knowledge of cancer research	multiple cancers	knowledge about cancer and research; trial awareness; cultural misconceptions about cancer treatment	community-based education; training promotores de salud to disseminate knowledge about cancer research in community	no	yes	prospective cohort study	27	qualitative; quantitative	yes - though while knowledge about research increased, participants were not more likely to participate in research, in fact that number dropped from 21 to 19 people (BUT 95% were already willing to donate saliva/blood/tissue for research pre-test)	ok- self-selection bias (promotores already interested in cancer research), no control group, difficult to generalize to other Latino communities, participants were 50% from Chihuahua region in Mexico. Also, this study only reports on training promotores, another question is then whether they succeed in bringing other members of community on board + increase their knowledge and willingness to par…	Pubmed	https://www.ncbi.nlm.nih.gov/pmc/articles/PMC4349504/
Recruitment Techniques and Strategies in a Community-Based Colorectal Cancer Screening Study of Men and Women of African Ancestry	2019-05-01	Davis, S.N. et al	USA	Tampa Bay, USA	Black	CBPR; screening research	colorectal	mistrust; financial burden; time burden; awareness of research	recruitment through invited presentations at churches and community centres; recruitment at health fairs; approaching people at library, barber shop, public buildings, laundromats; door-to-door canvassing in Black neighbourhoods; culturally tailored flyers/brochures; radio and TV spots; advertising on Twitter, Facebook and Craigslist; ads in newspaper and magazines that serve Black community; dir…	yes	yes	RCT	330	quantitative	yes - active recruitment had highest yield, followed by passive and then snowball. But snowball recruitment had highest enrollment efficiency, followed by passive and then active recruitment	excellent	PsycINFO	https://www.ncbi.nlm.nih.gov/pmc/articles/PMC5925754/	possible limitation: effects of recruitment technique might influence effect of intervention. Face-to-face recruitment had highest yield.
Engaging rural communities in genetic research: challenges and opportunities	2017-07-01	Dean, C. et al	USA	Illinois, USA	rural	genomic research; attitudes towards cancer/genomic research; CBPR	multiple cancers	mistrust; misuse by insurance company; afraid of results; conflicting commitments; lack of time/time burden	building trust with communities via mayor; endorsement of village council; local focus groups to design research; local 'champions' to help in recruitment; posts on Facebook (groups); flexible recruitment times	no	yes	mixed methods	30	quantitative; qualitative	yes - 3 out of 4 communities agreed to participate in genomic research	good	PsycINFO	https://www.ncbi.nlm.nih.gov/pmc/articles/PMC5496842/
Timing is everything: methodologic issues locating and recruiting medically underserved women for abnormal mammography follow-up research	2008-07-01	Fair, A.M. et al	USA	Nashville, Tennessee, USA	Black women; ethnic minority women	early detection research; screening research	breast	patients are hard to reach for follow-up and recruitment	more rigourous searches to find their contact details and attempt recruitment; call back multiple times until potential participant is reached	no	yes	retrospective case-control study	76	quantitative	no - 159 out of 227 eligible women were succesfully contacted, but recruitment was time-consuming and costly. Response rate was fairly poor: of those eligible and contacted, response rates were 71% (AA), 59% (Cau), and 47% (other), making it extremely labour intensive for the yield.	good - straightforward article and research	Pubmed	https://www.ncbi.nlm.nih.gov/pmc/articles/PMC2483696/
A randomized trial of recruitment methods for older African American men in the Prostate, Lung, Colorectal and Ovarian (PLCO) Cancer Screening Trial	2004-08-01	Ford, M.E. et al	USA	Southern Michigan; Northern Ohio, USA	Black men	screening research	prostate; lung; colorectal	mistrust; fear of misconduct; cost of participation; transportation; childcare; study design;	personal contact; team members of similar ethnicity; churches as study sites; transportation to churches	no	yes	RCT	12400	quantitative; qualitative	yes - only church-based intervention arm was statistically significantly different from other intervention arms and control	excellent - very clear trial of various recruitment strategies	Pubmed	https://journals.sagepub.com/doi/pdf/10.1191/1740774504cn029oa
Developing partnerships and recruiting dyads for a prostate cancer informed decision making program: lessons learned from a community-academic-clinical team	2012-06-01	Friedman, D.B .	USA	South Carolina, USA	Black	CBPR; screening research	prostate	mistrust; geographic accessability; co-morbidities; low socio-economic status; under-insured; knowledge; trial awareness; healthcare providers' trial awareness; 'structural' barriers	community-based research creation; educational intervention; radio recruitment; patient navigators; word of mouth recruitment; culturally appropriate language; flexible timing to work around participants' schedules	no	yes	mixed methods	81 focus group participants; 56 education programme participants;	qualitative; quantitative	Yes? Numbers seem good, but there is little reflection on whether this met targets	ok - no baseline and no evaluation of whether this was successful, though 'lessons learned'	Pubmed	https://www.ncbi.nlm.nih.gov/pmc/articles/PMC3352970/
Exploring Asian Indian views about cancer and participation in cancer research: an evaluation of a culturally tailored educational intervention	2020-04-01	Giri, V.N. et al	USA	Philadelphia, USA	Indian Asian	attitudes to and knowledge of cancer research; screening research	multiple cancers	health literacy; knowledge of cancer screening and research	Culturally tailored educational interventions; recruitment at community-based cultural centre in Philadelphia	yes	yes	intervention	23	quantitative	yes/no - immediate change post-intervention is not sustained in 1-month follow-up test	ok - small sample size for claims	Pubmed	https://www.ncbi.nlm.nih.gov/pmc/articles/PMC7062964/	From baseline to endpoint, we saw statistically significant improvements in willingness to participate in medical research (p < 0.05) or get a genetic test (p < 0.01).
Effective recruitment strategies and community-based participatory research: Community Networks Program Centers’ recruitment in cancer prevention studies	2014-03-01	Greiner, K.A. et al	USA	Florida, Kansas, North Carolina, USA	Hispanic women; Native American women; Black women; Black; Hispanic	early detection research; prevention research; screening research; knowledge of and attitudes towards cancer	colorectal; breast; prostate;	research design discourages or prohibits participation; not culturally appropriate; mistrust; inadequate outreach efforts; health care provider communication; knowledge	recruitment in waiting rooms of primary health centres; low-literacy brochures; training community health promoters/promotores de salud; recruitment via trained community health promoters/promotores de salud; call at different times to reach participants/flexibility; social marketing campaign on Facebook/Twitter; recruiters from community; recruitment in churches, hair salons, health fairs, suppo…	no	yes		2215	quantitative; qualitative	yes - mixed per study, but overall good outcomes	good	MANUAL	https://www.ncbi.nlm.nih.gov/pmc/articles/PMC3971731/	See individual studies (3 full and 2 pilots), some of them are already in here (e.g. Friedman prostate dyads study) and some are prevention only (SISTAS)
Recruitment methods employed in the prostate, lung, colorectal, and ovarian cancer screening trial	2009-02-01	Gren, L. et al	USA	across USA, including Hawaii, USA	Black, Hispanic, Asian/Pacific Islanders; rural	early detection research; screening research	prostate; lung; colorectal; ovarian	unspecified	direct mail invitation to healthy people found in commercial mailing lists, department of motor vehicles, health plan members, voters' registrstion, AARP; community outreach via health fairs, churches, utility bills, union newsletters, 'invite a friend' flyers or referrals, enrollment seminars; ads in newspapers, on TV and on radio; word-of-mouth	no	yes		154934	quantitative	no? - 95% of participants were recruited via direct mail, but enrollment for direct mail was 1.0% on average	ok - Numeric data on recruitment processes were not kept consistently at individual screening centers. Numeric data in this article are based on the experiences of 5/10 centers. Also perhaps a little dated as it doesn’t use internet? :astly, Community outreach used more for recruiting minorities. However, direct mail recruited 95% of people. BUT this paper has very good breakdowns of each recruit…	MANUAL	https://www.ncbi.nlm.nih.gov/pmc/articles/PMC4651181/	Community outreach used more for recruiting minorities. However, direct mail recruited 95% of people. Mass media supported the direct mail, since people were already familiar or felt like they had received endorsement via mass media.
How can we recruit more men of African or African-Caribbean ancestry into our research? Co-creating a video to raise awareness of prostate cancer risk and the PROFILE study	2022-04-01	Hainsworth, E. et al	UK	Southeast England, UK	Black men	genomic research; CBPR	prostate	discrimination; mistrust; limited access to care	discussion panel of men with African/Caribbean ancestry to develop a video that raises awareness and promote research participation; culturally tailored video mailed to potential research participants and spread online	yes	yes	mixed methods	mixed - 7 men participated in panel, 103 men were recruited in 2021	qualitative; quantitative	yes - recruitment of Black men increased 3-fold since video was made compared to previous years	good	Pubmed	https://www.ncbi.nlm.nih.gov/pmc/articles/PMC9014400/	Good study, one thing that could be better is results - yes recruitment of Black men went up three-fold but what other factors could influence this? How do we know how much was the video?
Recruiting African American Women to Participate in Hereditary Breast Cancer Research	2005-11-01	Halbert, C.H. et al	USA	Philadelphia, USA	Black women	early detection research; genomic research	BRCA1; BRCA2; breast; cervical	unspecified	recruitment in cancer centres; recruitment via community oncology resources; recruitment via health fairs	no	yes		783	quantitative	yes	ok - focuses on recruitment progression. Important finding is that % of women who participated after being found eligible was no different from other studies with white participants, which questions fact that AA's are unwilling to participate. Especially when they were referred from oncology clinics they were likely to enrol. Study doesnt take sociodemographics into account, and has not much eval…	Pubmed	https://doi.org/10.1200/JCO.2004.00.4952
An intergenerational approach to prostate cancer education: findings from a pilot project in the southeastern USA	2014-12-01	Jackson, D.D. et al	USA	Southeast region, USA	Black men	attitudes to and knowledge of cancer research	prostate	knowledge; trial awareness	prostate cancer education programme; education about CCTs	yes	yes	mixed methods	28	quantitative	yes/no - most changes not statistically significant	ok - use concept of study, but not outcomes: sample sixe is too small to make statements about whether this works or not	Pubmed	https://www.ncbi.nlm.nih.gov/pmc/articles/PMC4141905/	Focuses on various issues related to prostate cancer, incl willingness to participate in cancer research. Sample size is very small, not enough to make (statistically significant) conclusions
Strategies for recruiting African American men into prostate cancer screening studies	2009-11-01	Jones, R.A.; Steeves, R., Williams, I.	USA	rural Central Virginia, USA	Black men	screening research; attitudes to and knowledge of cancer research	prostate; recruitment	mistrust; lack of cultural sensitivity in researchers; lack of transportaiton; geographic accessibility; trial awareness; inadequate incentives	recruitment at places where Black men are found: barbershops, community health centres, church; word-of-mouth recruitment; trusting relationships with community gatekeepers	no	yes		17	quantitative; qualitative	yes? Word-of-mouth was essential for reaching the majority of participants (11)	good	Pubmed	https://www.ncbi.nlm.nih.gov/pmc/articles/PMC2886148/
Pilot Intervention Outcomes of an Educational Program for Biospecimen Research Participation	2013-03-01	Kiviniemi, M.T.	USA	Niagara Falls, NY, USA	Black, lower socio-economic status	CBPR; genomic resesarch; biobanking		fear of biobanking; fear of participating in research	recruitment at health fair, recruitment after educational session; both via local cancer centre; biospecimens collected immediately after educational intervention	yes	yes		148	quantitative; qualitative	yes - 114 out of 148 consented to participate in some part of the biobanking process	good	MANUAL	https://www.ncbi.nlm.nih.gov/pmc/articles/PMC3597756/
Latin American Cancer Research Coalition: Community primary care/academic partnership model for cancer control	2006-10-01	Kreling, B.A. et al	USA	Washington DC, USA	Hispanic; incomplete education; uninsured; recently immigrated	knowledge of and attitudes towards cancer;	breast; colorectal; cervical	lack of culturally competent care; low use of screening; limited access to healthcare services; knowledge;	multimodal intervention; increase knowledge about early detection and CCTs; develop media messages about need for screening; trust building in community clinics; bilingual and bicultural teams recruit in churches, stores, hair salons; health fairs and partner clinics	yes	yes	mixed methods	large number spread across different projects - unable to count	quantitative; qualitative	yes	good - large-scale project but with separate focus on early detection studies/recruitment methods	Pubmed	https://acsjournals.onlinelibrary.wiley.com/doi/10.1002/cncr.22145	Parts of study focus on other things, but recruitment strategies mentioned - incl in early detection. The Latin American Cancer Research Coalition (LACRC) ended in 2010.
A cancer center's approach to engaging African American men about cancer: the men's fellowship breakfast, Southeastern Michigan, 2008-2014	2014-09-01	Langford, A.T., Griffith, D.M., Beasly, D.D., Braxton, E.I.	USA	Ypsilanti and Ann Harbor, Michigan, USA	Black men	attitudes to and knowledge of cancer research; prevention	prostate; colorectal; lung;	knowledge; trial awareness	Breakfasts Saturday morning to disseminate information about trials, lifestyle, prevention and screening and other topics that men would find interesting; recruitment via Church, hospitals, social services agencies and universities; recruitment via paid newspaper and radio advertisements	no	yes	mixed methods	425	qualitative; quantitative	yes - at least 62% of men said they were 'somewhat willing' or 'strongly' willing to participate in a clinical trial after the breakfast	good - though while % of men willing to participate in research is cannot be compared to pre-intervention level because there is no pre-test/baseline	Pubmed	https://www.ncbi.nlm.nih.gov/pmc/articles/PMC4176474/
Latina recruitment for cancer prevention education via Community Based Participatory Research strategies	2009-01-01	Larkey, L.K. et al	USA	Phoenix, Arizona, USA	Hispanic women; lower socio-economic status; under-insured	CBPR; prevention	cervical; breast; colorectal	lack of insurance; mistrust; less exposure to recruitment/not invited; lack of transportation; childcare; family responsibilities; research and healthcare not available at convenient times	community-based; promotoras da salud/community health educators; culturally tailored education; community-based selection of recruitment sites; NO financial compensation	yes	yes	randomized controlled community trial	1035	quantitative; qualitative	yes - high level of community participation in all levels of research and impressive recruitment yield	excellent - 110 recruitment sites, over 144 randomized groups, very extensive description of CBPR practices	Pubmed	https://pubmed.ncbi.nlm.nih.gov/18775798/
Factors Associated With Participation in Cancer Prevention and Control Studies Among Rural Appalachian Women	2011-05-01	Leach, C.R. et al	USA	rural Appalachia, USA	rural women	screening research; knowledge of and attitudes towards cancer	breast; cervical	mistrust; knowledge; geographic accessibility; access to care competing time demands; family responsibilities; lack of transportation	recruitment via churches; researchers attend community events; building trust over time; establishing a presence in community; recruitment via local senior citizen center; face-to-face recruitment; snowball recruitment; door-to-door canvassing; participating in volunteer efforts;	no	yes	cohort study (study 1) and mixed	15 (study 1) and 430 (unsure, study 2)	qualitative; quantitative	no - personal recruitment face-to-face was much more efficient, and establishing relationships with community leaders (e.g. church ministers) was essential for overcoming trust barrier. Attrition rates for study too were very low: 7%. Snowball sampling leads to researchers talking to wealthier/better connected/higher educated participants, which mean the very hard to reach are still not reached. …	ok - studies are mostly described, in the first case quite little information, second case study clearer evaluation	PsycINFO	https://www.ncbi.nlm.nih.gov/pmc/articles/PMC3086267/
The impact of a community-based clinical trial educational intervention among underrepresented Chinese Americans	2014-03-01	Ma, G.X. et al	USA	greater Philadelphia area, USA	Chinese; Asian; lower socio-economic status; recently immigrated	CBPR; attitudes to and knowledge of cancer research	multiple cancers	knowledge; trial awareness; mistrust; cultural beliefs; language barriers	culturally and linguistically appropriate community-based educational intervention; recruitment of community representatives to become community health educators who organise education; workshops focus on benefits to science and to larger Asian American community	no	yes	intervention	284	qualitative; quantitative	yes	good	Pubmed	https://www.ncbi.nlm.nih.gov/pmc/articles/PMC3951588/	Clinical trials are not differentiated between therapeutic and non-therapeutic here, but after reading article I do not think the differentiation matters for the context + intervention
Mobile Mammography Screening as an Opportunity to Increase Access of Rural Women to Breast Cancer Research Studies	2019-09-01	McElfish P.A. et al	USA	Arkansas, USA	rural; incomplete education; Hispanic women; Black women	genomic research; biobanking	breast	trial awareness; geographic acessability;	mobile mammography van recruitment; community event recruitment; recruitment during screening	no	yes	non-randomized cross-sectional study	5850	quantitative	yes - recruitment via MammoVan was good, especially for reaching lower educated women and more rural women. Recruitment at community events was better for recruiting Hispanic women.	good	Pubmed	https://www.ncbi.nlm.nih.gov/pmc/articles/PMC6757489/
Comparison of Health Communication Channels for Reaching Hispanics about Biobanking: A Pilot Trial	2019-08-01	McIntyre, J. et al	USA, (and Puerto Rico)	Florida, USA	Hispanic	genomic research; biobanking; prevention research; attitudes to and knowledge of cancer research	multiple cancers	knowledge	educational intervention; education about biobanking (importance of, for cancer) and cancer prevention; materials in Spanish; educational video in Spanish; face-to-face discussion group for education; asking to sign up for biobanking after intervention	yes	yes	RCT	124	quantitative	yes - 91% of participants agreed to register in biobanking registry upon completion of educational intervention and knowledge increased significantly. Discussion groups had lowest participation rate, but greatest observed increase in knowledge was In discussion groups	ok - intention to donate =/= actual behaviour; in some parts not clear whether results differ for Florida or PR;	PsycINFO	https://www.ncbi.nlm.nih.gov/pmc/articles/PMC5628139/	About half of sample in Puerto Rico (other half in Florida). But outcomes are stratified according to location so PR can be separated from Florida part.
Engaging Black Churches to Address Cancer Health Disparities: Project CHURCH	2018-07-01	McNeill, L.H. et al	USA	Houston, Texas, USA	Black	prevention; genomic research; CBPR	multiple cancers	individual, societal, practical barriers	CBPR; recruitment and participation at churches; events to promote cancer (research) awareness; frequent results dissemination in ways that interest community; implementation of cancer control programmes and services; provide research experience to minority trainees interested in cancer disparities; organising fairs with church to recruit participants; pastors speak about research from pulpit;	no	yes	cohort study	2338	quantitative	yes - incredibly successful recruitment	excellent - great participation and retention rates, though note limitation of exclusive church recruitment as well as high level of education among study participants	Pubmed	https://www.ncbi.nlm.nih.gov/pmc/articles/PMC6060541/#B7
Engaging diverse populations in biospecimen donation: results from the Hoy y Mañana study	2016-10-01	Rodriguez, E.M. et al	USA	Buffalo, Niagara Falls, USA	Hispanic; Black	genomic research	multiple cancers	trial awareness; mistrust; transparency of how samples will be used (data); minorities aren't approached to participate	educational intervention on genomic research and the need for representation of diverse populations; educational intervention followed by immediate opportunity to donate blood sample; open events like health fair with direct opportunity to donate blood sample	yes	yes	intervention	370	quantitative	yes - much more willing to participate in genomic research after education programme.	good	MANUAL	https://www.ncbi.nlm.nih.gov/pmc/articles/PMC5138162/
Barriers to and Facilitators of Recruitment of Adult African American Men for Colorectal Cancer Research: An Instrumental Exploratory Case Study	2021-05-01	Rogers, C.R. et al	USA	Utah, Minnesota, Ohio, USA	Black men	CBPR; screening research; recruitment research	colorectal	geographic accessability; mistrust; limited access to public spaces	community involvement; culturally tailored marketing materials; collaborating with community organisations; incentives ($20 gift card); recruitment at barbershops; partnership with barbershops and churches; recruitment via churches (flyers and from pulpit); (timing) event directly after Sunday service; providing food as incentive	no	yes	mixed methods	84	qualitative	yes - face-to-face recruitment strategies, especially partnering with community organisations, work better than online/tailored marketing materials. Church was by far most succesful recruitment strategy. Followed by barbershop	good	Pubmed	https://ascopubs.org/doi/full/10.1200/OP.21.00008	face-to-face recruitment strategies, especially partnering with community organisation better than online/tailored marketing materials. Potential of social media is noted, but social media was used in an informal manner
Breast cancer knowledge, attitudes, and screening behaviors among African American women: the Black cosmetologists promoting health program	2007-04-01	Sadler, G.R. et al	USA	San Diego, California, USA	Black women	knowledge of and attitudes towards cancer; screening research	breast	unspecified	conducting surveys/research at Black beauty salons; cosmetologist trained as health educator;	yes	yes	cross-sectional study	1055	quantitative	yes - high accrual rate in beauty salon	good - very straightforward study, tests just recruitment strategy which is partnering up with beauty salons	PsycINFO	https://www.ncbi.nlm.nih.gov/pmc/articles/PMC1858685/	"Ninety-four percent (989/1055) of the women disagreed with the statement, "Breast cancer early detection does not make a difference"
Brief report: if you build it, they will come: methods for recruiting Latinos into cancer research	2005-05-01	Sheppard, V.B. et al	USA	Washington DC, USA	Hispanic; lower socio-economic status; uninsured	prevention research; early detection; screening;	colorectal; breast; lung;	unspecified	Latino researchers and providers; culturally tailored materials resleaed through culturally appropriate outlets such as Latino radio stations.	no	yes	retrospective analysis	1170	quantitative	yes	good	Pubmed	https://www.ncbi.nlm.nih.gov/pmc/articles/PMC1490123/
Recruitment of African American Churches to Participate in Cancer Early Detection Interventions: A Community Perspective	2019-04-01	Slade, J.L. et al	USA	Prince George's County, Maryland, USA	Black	CBPR; early detection research	prostate; breast; colorectal	mistrust due to historical exploitation; power imbalance; knowledge	peer educators from church; community engagement; workshops organised by church to promote cancer early detection interventions; trust building	no	no	intervention/mixed methods	34 churches, of 150-500 church members each	qualitative	yes?	ok - not much in-depth analysis of (lack of) success and no mention of limitations	Pubmed	https://www.ncbi.nlm.nih.gov/pmc/articles/PMC5916822/#R19
Sistas Taking a Stand for Breast Cancer Research (STAR) Study: A Community-Based Participatory Genetic Research Study to Enhance Participation and Breast Cancer Equity among African American Women in Memphis, TN	2018-12-01	Smith, A. et al	USA	Memphis, Tennessee, USA	Black women	genomic research; CBPR	breast	mistrust; researchers' cultural insensitivity; stigma participating in research; African Americans not approached for research	CBPR; educational workshops; Q&A sessions; culturally appropriate marketing; events at diverse locations; recruitment at community events (e.g. 5K walk for breast cancer); development of partnerships with prominent breast cancer advocates	no	yes	intervention	364	quantitative	yes - high no of participants, 91% of whom decided to donate saliva sample, and good retention rates	good	Pubmed	https://www.ncbi.nlm.nih.gov/pmc/articles/PMC6313663/
Challenges and opportunities using online portals to recruit diverse patients to behavioral trials	2019-12-01	Tabriz, A.A. et al	USA	Detroit area, USA	Black; Asian; Hispanic; other	screening research	colorectal	trial awareness; mistrust; financial burden	EHR online patient portal; message from primary care physician to prompt screening	yes	yes	intervention	4518	quantitative	yes/no - patient portal was effective for recruiting and enrolling participants, but ethnic minority patients were less likely to access the portal and see the message. When ethnic minority participants enrolled in the trial, they were less likely than White counterparts to complete all trial tasks	ok - ethnic minorities are associated with less successful intervention, but not very self-critical about why this may be and what can be done (apart from suggesting 'culturally appropriateness')	Pubmed	https://www.ncbi.nlm.nih.gov/pmc/articles/PMC6857600
Biospecimen Education Among Pacific Islanders in Southern California	2019-08-01	Tan, N.S. et al	USA	Southern California, USA	Pacific Islanders; Native Hawaiian; Marshallese; Samoan; Chamorro; Tongan	genomic research; biobanking; CBPR	multiple cancers	lack of culturally tailored materials; lack of culturally relevant materials; concerns about confidentiality, privacy and discrimination; unwillingness to undergo donation procedures because of fear of pain; not wanting to uncover potential health problems	multimodal intervention; recruiters have relationship with community; face-to-face recruitment at church, community events, social clubs; recruitment via phone calls, text messages, emails; educational sessions at churches, universities, community centres; creation of culturally tailored video about biospecimen research; culturally tailored brochures;	yes	yes	intervention	219	quantitative; qualitative	yes - increase in knowledge and in willingness to donate biospecimen	excellent	Pubmed	https://www.ncbi.nlm.nih.gov/pmc/articles/PMC6170728/
Enhancing Biospecimen Knowledge among Healthcare Providers and Representatives from Community Organizations	2017-09-01	Tham, H.M. et al	USA	Washington; Oregon; California; Hawaii; Guam USA	Black; Pacific Islander; Native American; Hispanic	genomic research; treatment research;	multiple cancers	knowledge; mistrust; fear of donating samples;	educational intervention to increase knowledge about biospecimen donation and its importance, half of participants work in healthcare	yes	yes	intervention	255	quantitative	yes - though 'I would participate in research study if asked to contribute a biological sample' increased 10% for healthcare workers and 6% for non-healthcare workers, so no overwhelming increase. Maybe because willingness to participate was alreay high (70% and 75%)	good - note that change is in likelihood to donate biospecimen, only hypothetical	Pubmed	10.1177/1524839916641069	OHSU is one of the sites where this research was piloted
Enrolling Minority and Underserved Populations in Cancer Clinical Research	2016-01-01	Wallington, S.F. et al	USA	Washington DC, USA	Black women; lower socio-economic status	CBPR; various types of research (prevention, awareness, risk)	breast; HPV	lack of cultural competence in recruitment; geographic accessibility	diverse staff; culturally competent study procedures; community access via gatekeepers; keeping research location close to where people work/live/study; creating community partnerships	no	yes	intervention?	559	quantitative	yes - after intervention, almost all accrual targets of the participating studies were met, and those that weren't were close to being met	good - though no data on retention, compliance, or specific study outcomes among the recruited individuals	Pubmed	https://www.ncbi.nlm.nih.gov/pmc/articles/PMC4691547
Recruiting Chinese Americans into cancer screening intervention trials: strategies and outcomes	2014-04-01	Wang, J.H. et al	USA	Washington DC, NYC and Philadelphia, USA	Chinese; Asian	screening research	breast; colorectal	language barrier; mistrust; recruitment not culturally appropriate	bilingual staff; culturally and linguistically tailored materials; recruitment by Chinese American physicians; recruitment via letter and follow-up phone call; in-person recruitment at community events;	no	yes	intervention	1119	quantitative; qualitative	yes - very different outcomes per area, but generally most participants were recruited through face-to-face methods	excellent - very useful breakdown of each recruitment strategy, yield and cost	Pubmed	https://www.ncbi.nlm.nih.gov/pmc/articles/PMC3972290	Recuitment to TEST screening adherence, not recruitment for screening
Responding to healthcare distrust among underserved communities: Phase II	2022-01-01	Webb Hooper, M. et al	USA	Ohio, USA	Black; lower socio-economic status	CBPR; attitudes to and knowledge of cancer research	N/A	mistrust	community-engaged trust building project; community listening tour; participant-driven discussions with researchers about research, healthcare system, among other topics at cancer centre	no?	yes	mixed methods	154	qualitative; quantitative	yes - Patients report more trust and higher likelihood to participate in cancer research, and increased trust in medical researchers	good	Pubmed	https://onlinelibrary.wiley.com/doi/10.1002/pon.5841	Patients report more trust and higher likelihood to participate in cancer research, and increased trust in medical researchers. (but since research is ongoing it's not clear yet to what extent the research led to increased participation)
Feasibility Test of a Community-Relevant Intervention Designed to Promote African American Participation in Translational, Breast Cancer Disparities Research: Know About Health Options for Women (Know HOW)	2018-02-01	Yeary, K.H.K., et al	USA	Arkansas Lower Mississippi River Delta, USA	Black women; rural; lower socioeconomic status	genomic research; attitudes to and knowledge of cancer research; screening research; CBPR	breast	participant burden of research;	community-based participatory approach; community-relevant event; women volunteered to take tests at different stations for their own benefit and then were asked to donate the results like blood sample, survey; intervention at church or community-based organisation; gift card for participation; education about metabolic syndrome and lifestyle to prevent cancer;	no	yes	non-randomized controlled trial	48	quantitative	yes - though mammography screening, which had highest participant burden; was completed by only 40%. The easier the participation task, the higher the participation %	good	Pubmed	https://doi.org/10.1007/s13187-016-1032-3

## Sheet: Table 2
	Identified barriers to research participation	Frequency (n)
	Mistrust	21
	Lack of knowledge	14
	Lack of trial awareness	12
	Geographic accessibility	8
	Lack of cultural competency in research/recruitment	7
	Financial burden of participation	4
	Time burden of participation	4
	Fear of research procedures	4
	Concerns about confidentiality/privacy	4
	Stigma/misconceptions about participating in research	4
	Group not approached enough for research	3
	Practical barriers (general)	3
	Uninsured/underinsured	2
	Fear of uncovering health problems	2
	Discrimination	2
	Language barriers	2
	Limited access to health services	2
	Co-morbidities	1
	Table 2 – Barriers to research participation identified in included studies.

## Sheet: Supporting table - included ms
	Article title	Date	Authors	Link
1	A pilot program in collaboration with African American churches successfully increases awareness of the importance of cancer research and participation in cancer translational research studies among African Americans	2012-06-01	Colon-Otero, G. et al	https://www.ncbi.nlm.nih.gov/pmc/articles/PMC3736846/
2	Recruiting African Immigrant Women for Community‐Based Cancer Prevention Studies: Lessons Learned from the AfroPap Study	2019-05-01	Cudjoe, J. et al	https://pubmed.ncbi.nlm.nih.gov/31102117/
3	A pilot study of a culturally-appropriate, educational intervention to increase participation in cancer clinical trials among African Americans and Latinos	2021-09-01	Cunningham-Erves, J. et al	https://doi.org/10.1007/s10552-021-01449-7
4	Empowering Promotores de Salud as partners in cancer education and research in rural southwest Kansas	2015-01-01	Cupertino, A.P. et al	https://www.ncbi.nlm.nih.gov/pmc/articles/PMC4349504/
5	Recruitment Techniques and Strategies in a Community-Based Colorectal Cancer Screening Study of Men and Women of African Ancestry	2019-05-01	Davis, S.N. et al	https://www.ncbi.nlm.nih.gov/pmc/articles/PMC5925754/
6	Engaging rural communities in genetic research: challenges and opportunities	2017-07-01	Dean, C. et al	https://www.ncbi.nlm.nih.gov/pmc/articles/PMC5496842/
7	Timing is everything: methodologic issues locating and recruiting medically underserved women for abnormal mammography follow-up research	2008-07-01	Fair, A.M. et al	https://www.ncbi.nlm.nih.gov/pmc/articles/PMC2483696/
8	A randomized trial of recruitment methods for older African American men in the Prostate, Lung, Colorectal and Ovarian (PLCO) Cancer Screening Trial	2004-08-01	Ford, M.E. et al	https://journals.sagepub.com/doi/pdf/10.1191/1740774504cn029oa
9	Developing partnerships and recruiting dyads for a prostate cancer informed decision making program: lessons learned from a community-academic-clinical team	2012-06-01	Friedman, D.B .	https://www.ncbi.nlm.nih.gov/pmc/articles/PMC3352970/
10	Exploring Asian Indian views about cancer and participation in cancer research: an evaluation of a culturally tailored educational intervention	2020-04-01	Giri, V.N. et al	https://www.ncbi.nlm.nih.gov/pmc/articles/PMC7062964/
11	Effective recruitment strategies and community-based participatory research: Community Networks Program Centers’ recruitment in cancer prevention studies	2014-03-01	Greiner, K.A. et al	https://www.ncbi.nlm.nih.gov/pmc/articles/PMC3971731/
12	Recruitment methods employed in the prostate, lung, colorectal, and ovarian cancer screening trial	2009-02-01	Gren, L. et al	https://www.ncbi.nlm.nih.gov/pmc/articles/PMC4651181/
13	How can we recruit more men of African or African-Caribbean ancestry into our research? Co-creating a video to raise awareness of prostate cancer risk and the PROFILE study	2022-04-01	Hainsworth, E. et al	https://www.ncbi.nlm.nih.gov/pmc/articles/PMC9014400/
14	Recruiting African American Women to Participate in Hereditary Breast Cancer Research	2005-11-01	Halbert, C.H. et al	https://doi.org/10.1200/JCO.2004.00.4952
15	An intergenerational approach to prostate cancer education: findings from a pilot project in the southeastern USA	2014-12-01	Jackson, D.D. et al	https://www.ncbi.nlm.nih.gov/pmc/articles/PMC4141905/
16	Strategies for recruiting African American men into prostate cancer screening studies	2009-11-01	Jones, R.A.; Steeves, R., Williams, I.	https://www.ncbi.nlm.nih.gov/pmc/articles/PMC2886148/
17	Pilot Intervention Outcomes of an Educational Program for Biospecimen Research Participation	2013-03-01	Kiviniemi, M.T.	https://www.ncbi.nlm.nih.gov/pmc/articles/PMC3597756/
18	Latin American Cancer Research Coalition: Community primary care/academic partnership model for cancer control	2006-10-01	Kreling, B.A. et al	https://acsjournals.onlinelibrary.wiley.com/doi/10.1002/cncr.22145
19	A cancer center's approach to engaging African American men about cancer: the men's fellowship breakfast, Southeastern Michigan, 2008-2014	2014-09-01	Langford, A.T., Griffith, D.M., Beasly, D.D., Braxton, E.I.	https://www.ncbi.nlm.nih.gov/pmc/articles/PMC4176474/
20	Latina recruitment for cancer prevention education via Community Based Participatory Research strategies	2009-01-01	Larkey, L.K. et al	https://pubmed.ncbi.nlm.nih.gov/18775798/
21	Factors Associated With Participation in Cancer Prevention and Control Studies Among Rural Appalachian Women	2011-05-01	Leach, C.R. et al	https://www.ncbi.nlm.nih.gov/pmc/articles/PMC3086267/
22	The impact of a community-based clinical trial educational intervention among underrepresented Chinese Americans	2014-03-01	Ma, G.X. et al	https://www.ncbi.nlm.nih.gov/pmc/articles/PMC3951588/
23	Mobile Mammography Screening as an Opportunity to Increase Access of Rural Women to Breast Cancer Research Studies	2019-09-01	McElfish P.A. et al	https://www.ncbi.nlm.nih.gov/pmc/articles/PMC6757489/
24	Comparison of Health Communication Channels for Reaching Hispanics about Biobanking: A Pilot Trial	2019-08-01	McIntyre, J. et al	https://www.ncbi.nlm.nih.gov/pmc/articles/PMC5628139/
25	Engaging Black Churches to Address Cancer Health Disparities: Project CHURCH	2018-07-01	McNeill, L.H. et al	https://www.ncbi.nlm.nih.gov/pmc/articles/PMC6060541/#B7
26	Engaging diverse populations in biospecimen donation: results from the Hoy y Mañana study	2016-10-01	Rodriguez, E.M. et al	https://www.ncbi.nlm.nih.gov/pmc/articles/PMC5138162/
27	Barriers to and Facilitators of Recruitment of Adult African American Men for Colorectal Cancer Research: An Instrumental Exploratory Case Study	2021-05-01	Rogers, C.R. et al	https://ascopubs.org/doi/full/10.1200/OP.21.00008
28	Breast cancer knowledge, attitudes, and screening behaviors among African American women: the Black cosmetologists promoting health program	2007-04-01	Sadler, G.R. et al	https://www.ncbi.nlm.nih.gov/pmc/articles/PMC1858685/
29	Brief report: if you build it, they will come: methods for recruiting Latinos into cancer research	2005-05-01	Sheppard, V.B. et al	https://www.ncbi.nlm.nih.gov/pmc/articles/PMC1490123/
30	Recruitment of African American Churches to Participate in Cancer Early Detection Interventions: A Community Perspective	2019-04-01	Slade, J.L. et al	https://www.ncbi.nlm.nih.gov/pmc/articles/PMC5916822/#R19
31	Sistas Taking a Stand for Breast Cancer Research (STAR) Study: A Community-Based Participatory Genetic Research Study to Enhance Participation and Breast Cancer Equity among African American Women in Memphis, TN	2018-12-01	Smith, A. et al	https://www.ncbi.nlm.nih.gov/pmc/articles/PMC6313663/
32	Challenges and opportunities using online portals to recruit diverse patients to behavioral trials	2019-12-01	Tabriz, A.A. et al	https://www.ncbi.nlm.nih.gov/pmc/articles/PMC6857600
33	Biospecimen Education Among Pacific Islanders in Southern California	2019-08-01	Tan, N.S. et al	https://www.ncbi.nlm.nih.gov/pmc/articles/PMC6170728/
34	Enhancing Biospecimen Knowledge among Healthcare Providers and Representatives from Community Organizations	2017-09-01	Tham, H.M. et al	10.1177/1524839916641069
35	Enrolling Minority and Underserved Populations in Cancer Clinical Research	2016-01-01	Wallington, S.F. et al	https://www.ncbi.nlm.nih.gov/pmc/articles/PMC4691547
36	Recruiting Chinese Americans into cancer screening intervention trials: strategies and outcomes	2014-04-01	Wang, J.H. et al	https://www.ncbi.nlm.nih.gov/pmc/articles/PMC3972290
37	Responding to healthcare distrust among underserved communities: Phase II	2022-01-01	Webb Hooper, M. et al	https://onlinelibrary.wiley.com/doi/10.1002/pon.5841
38	Feasibility Test of a Community-Relevant Intervention Designed to Promote African American Participation in Translational, Breast Cancer Disparities Research: Know About Health Options for Women (Know HOW)	2018-02-01	Yeary, K.H.K., et al	https://doi.org/10.1007/s13187-016-1032-3
